# Supplementary material
Source: PubMed Central journal article supplement (PMC5519438)
Supplement: NIHMS856117-supplement-Supp_Fig_S1-4.pdf [file NIHMS856117-supplement-Supp_Fig_S1-4.pdf]

# Supplemental Figure S1

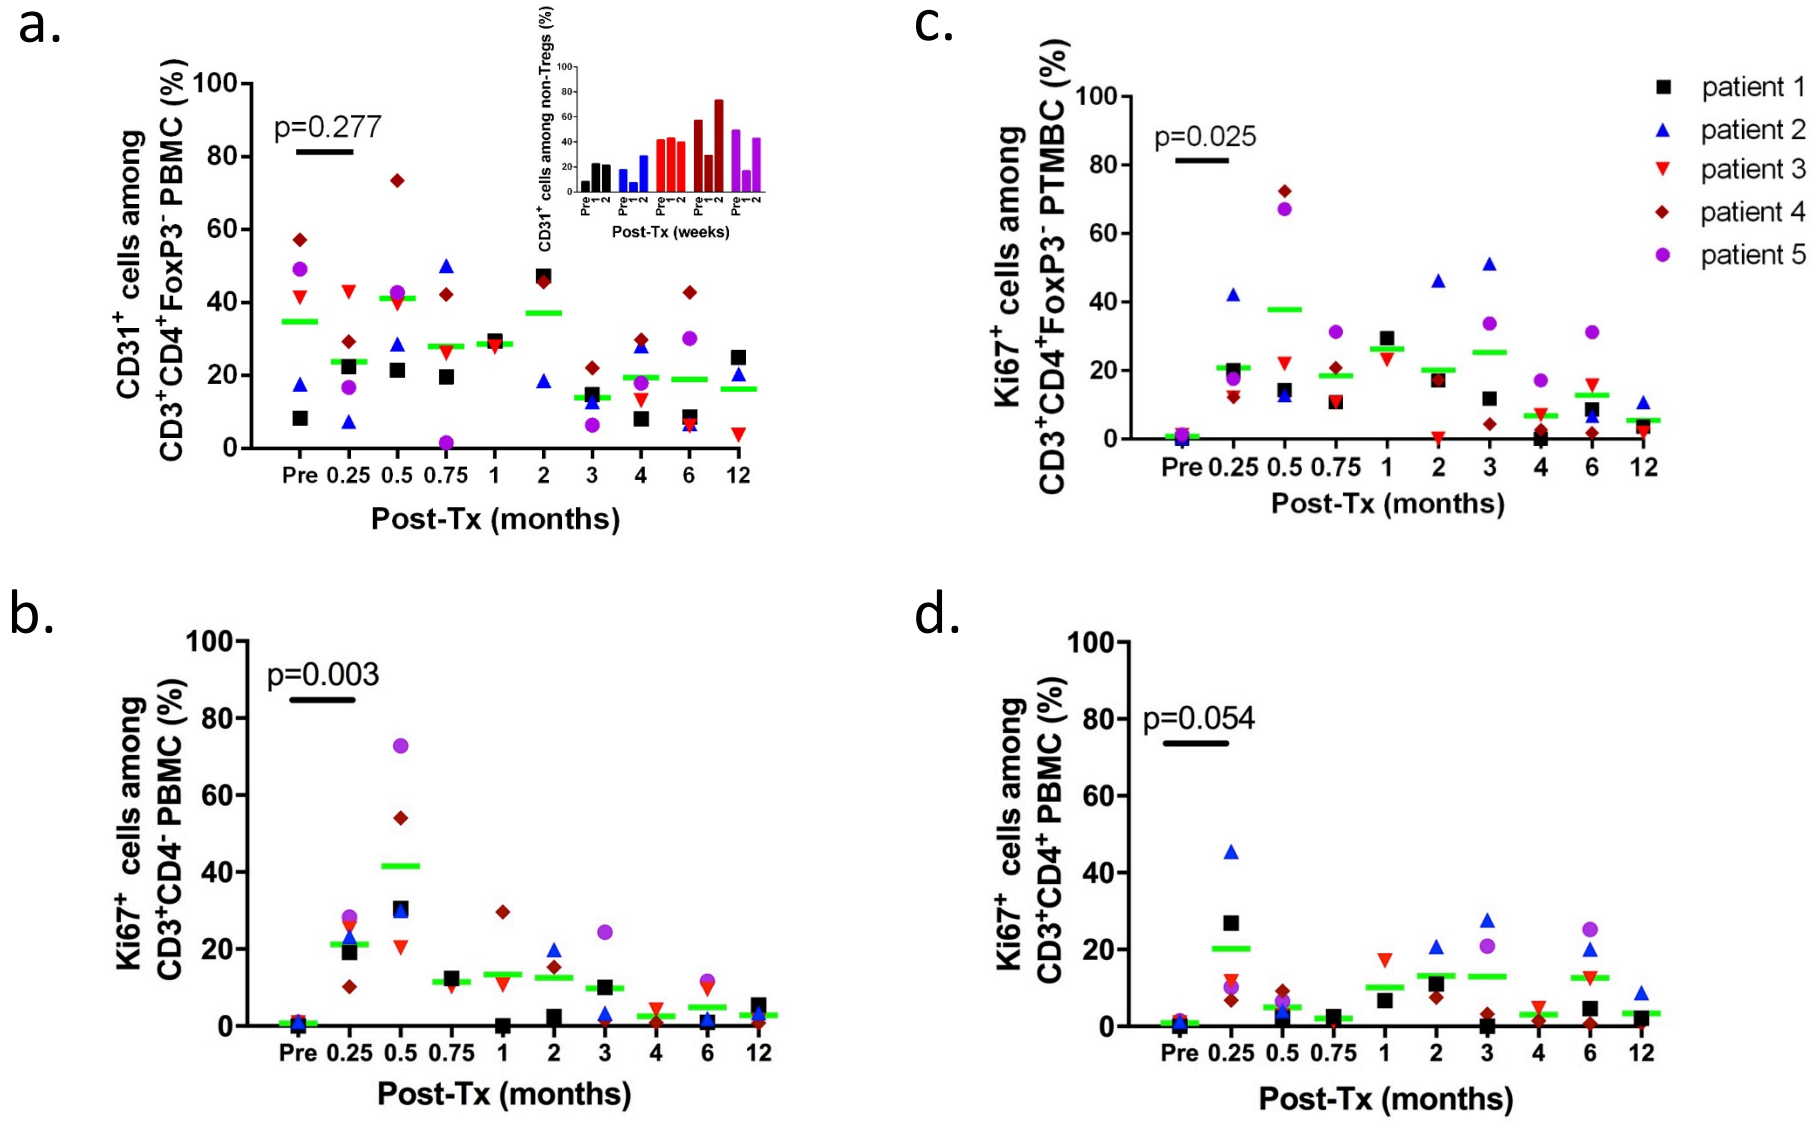

# Supplemental Figure S2

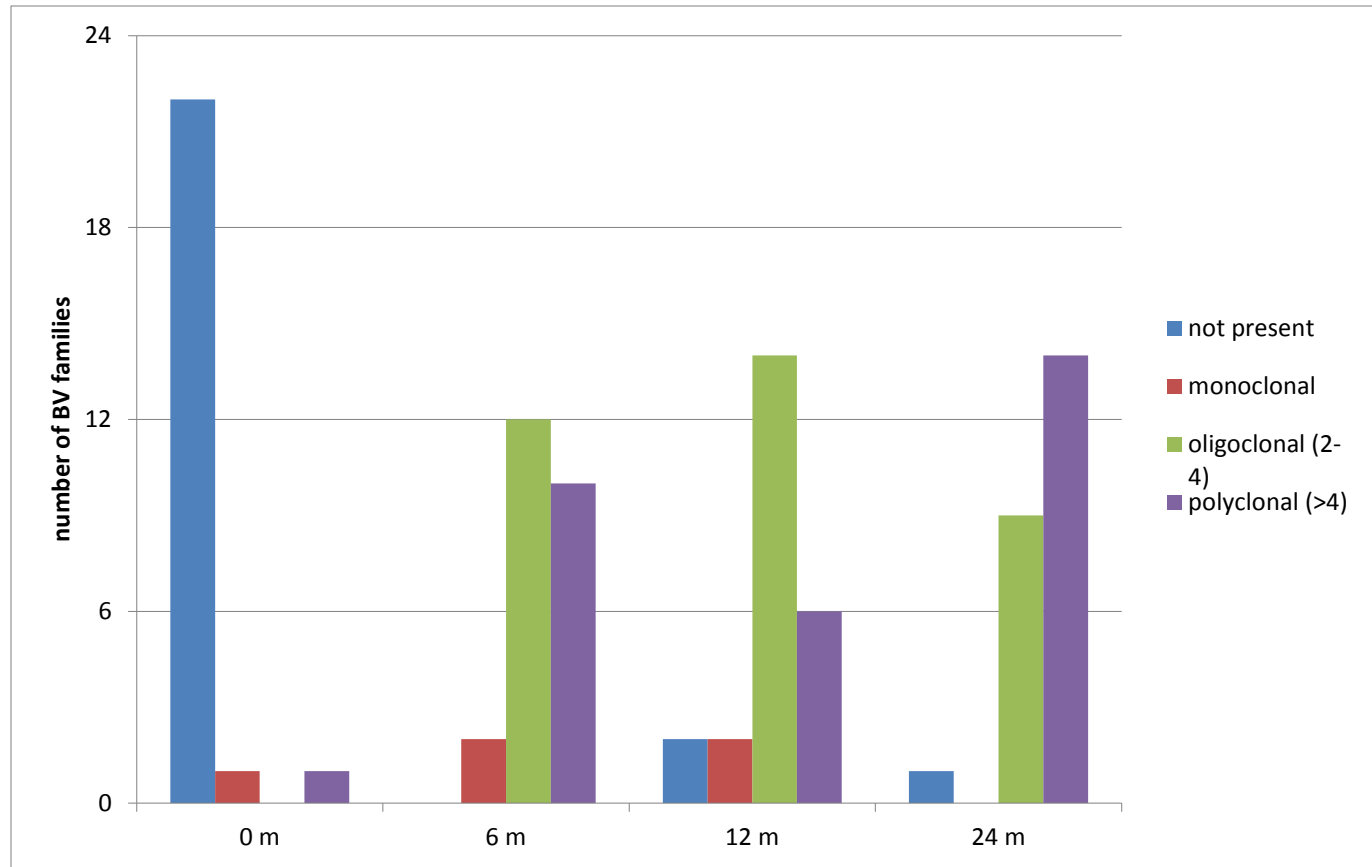

# Supplemental Figure S3

Patient 1

Patient 2

Patient 4

Patient 5

Recipient HLA I  $\uparrow$   
Recipient PBMCs  
HLA ABC  $\rightarrow$

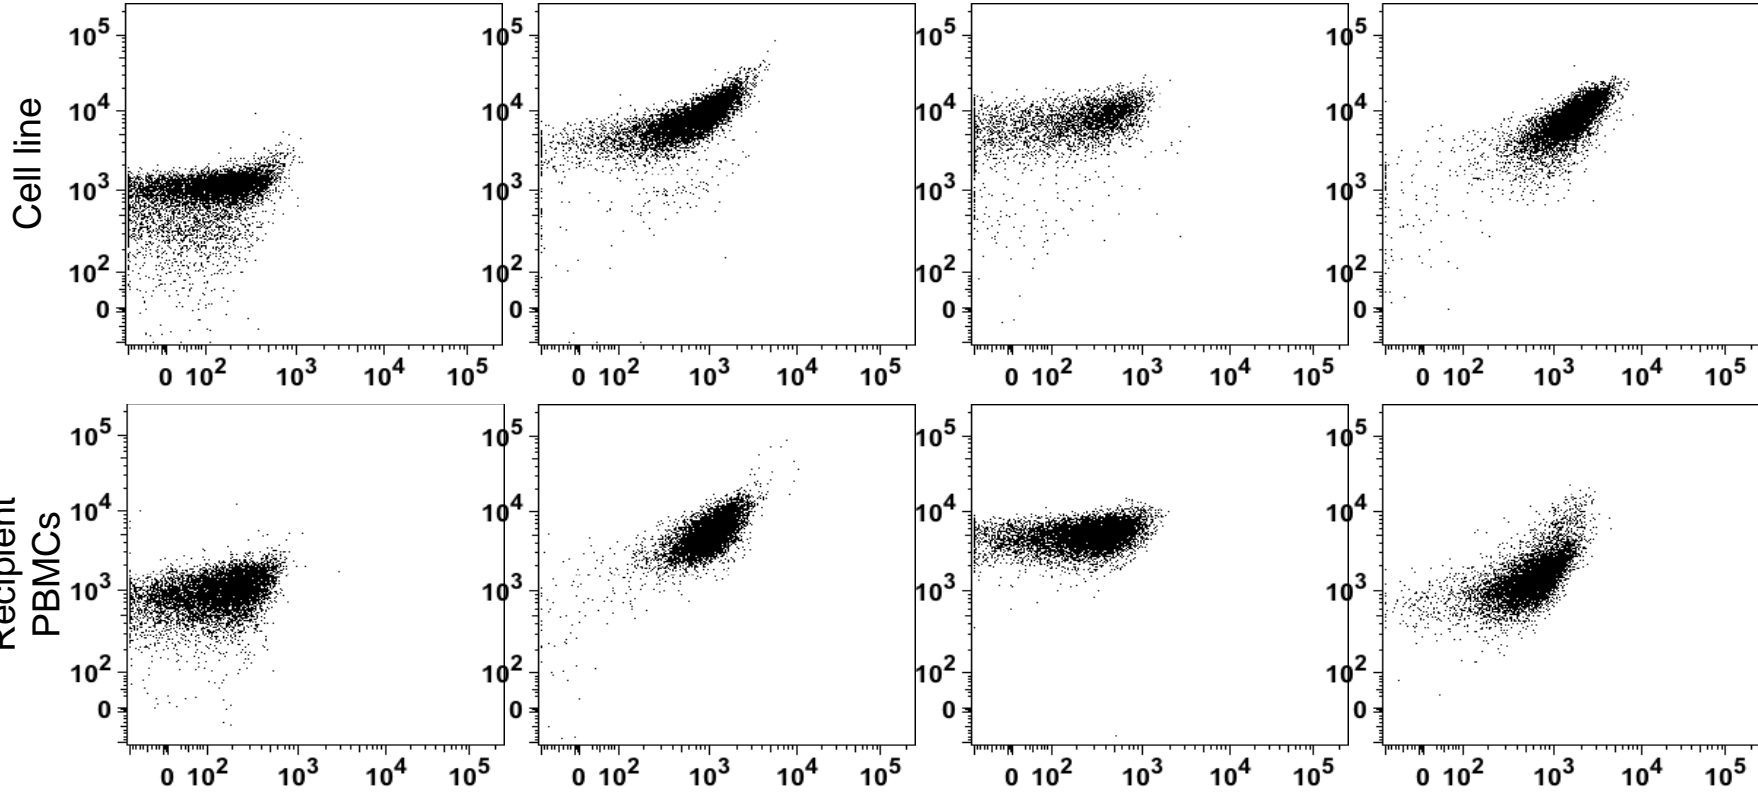

Gated on DAPI- CD3+

# Supplemental Figure S4

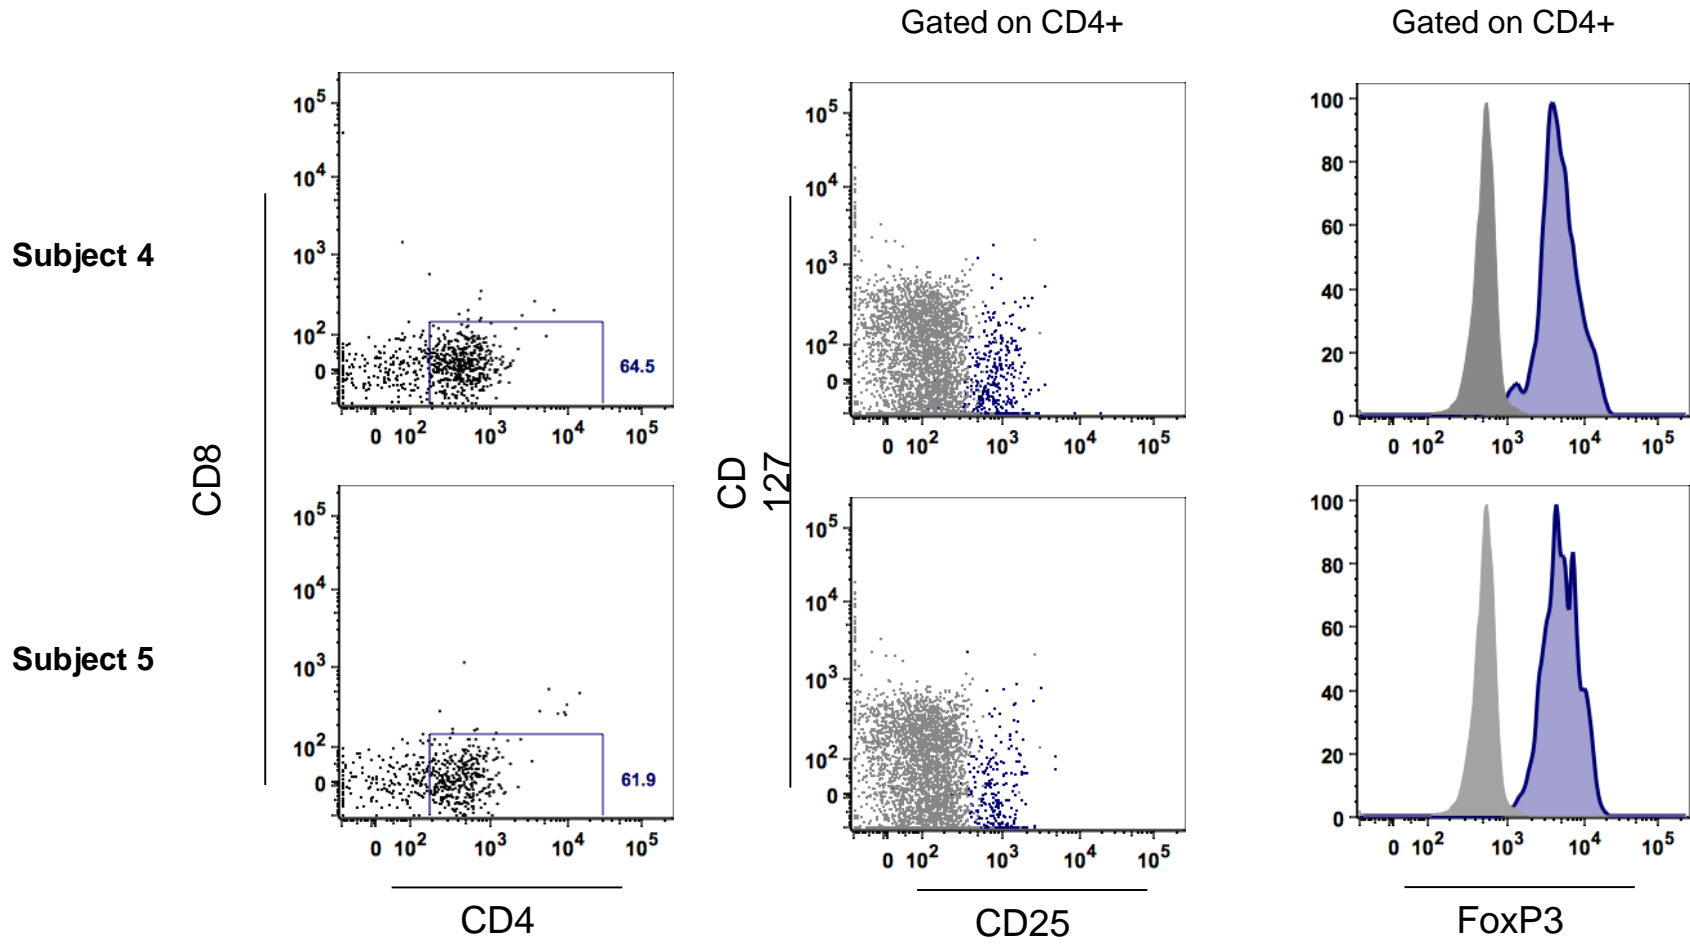

Gray = CD8 cells from cell line stained in parallel
